# Supplementary material for: Balanced Viscoelastic Properties of Pressure Sensitive Adhesives Made with Thermoplastic Polyurethanes Blends
Source: PubMed Central journal article supplement (PMC6835935; doi:10.3390/polym11101608), 2019-10-03
Supplement: polymers-11-01608-s001.pdf [file polymers-11-01608-s001.pdf]

Supplementary Material:

Balanced Viscoelastic Properties of Pressure Sensitive Adhesives Made with Thermoplastic Polyurethane Blends

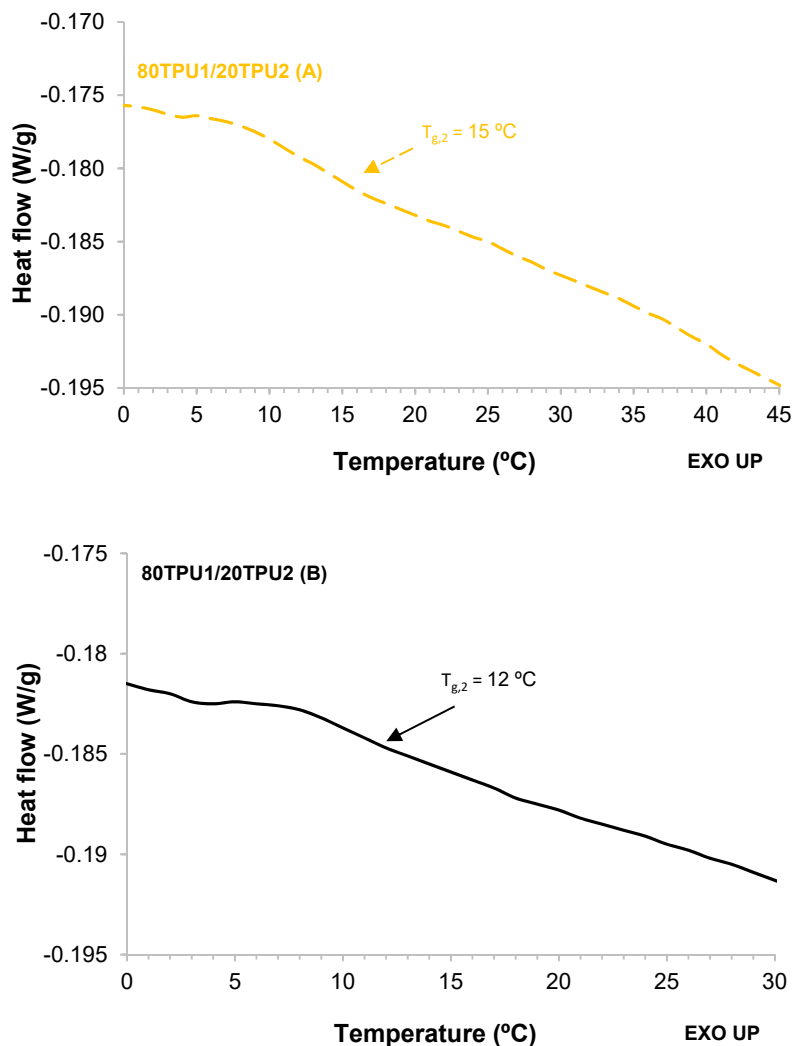

**Figure S1.** Expanded region of the DSC thermograms of 80TPU1/20TPU2 (A) and 80TPU1/20TPU2 (B) blends showing more clearly the glass transition due to the soft segments. Second DSC heating run.

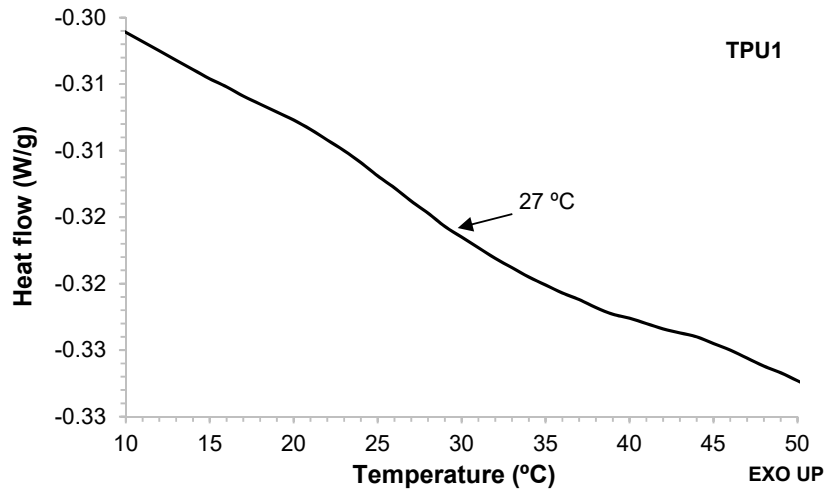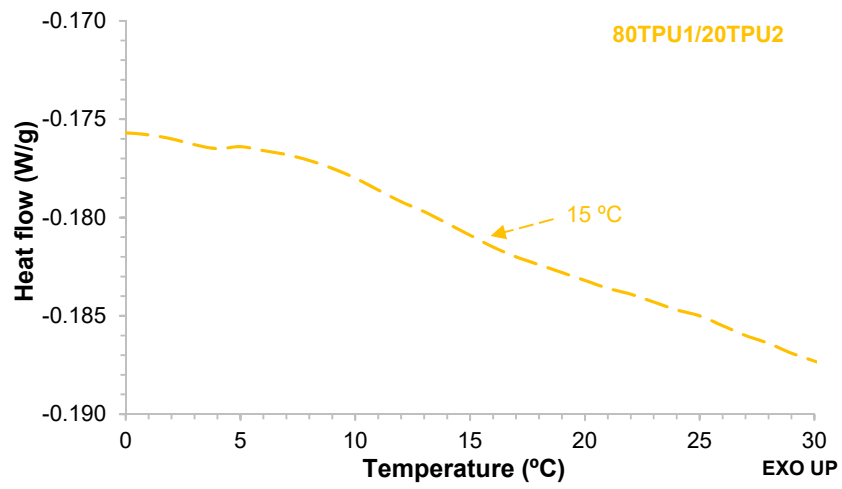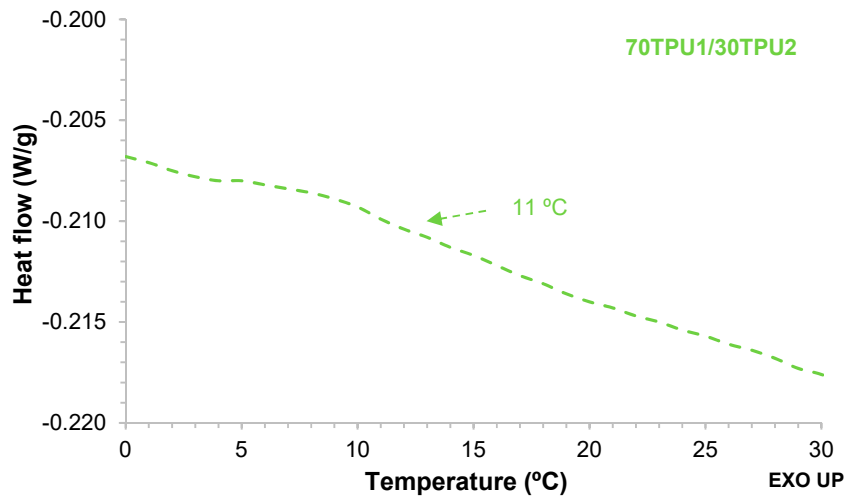

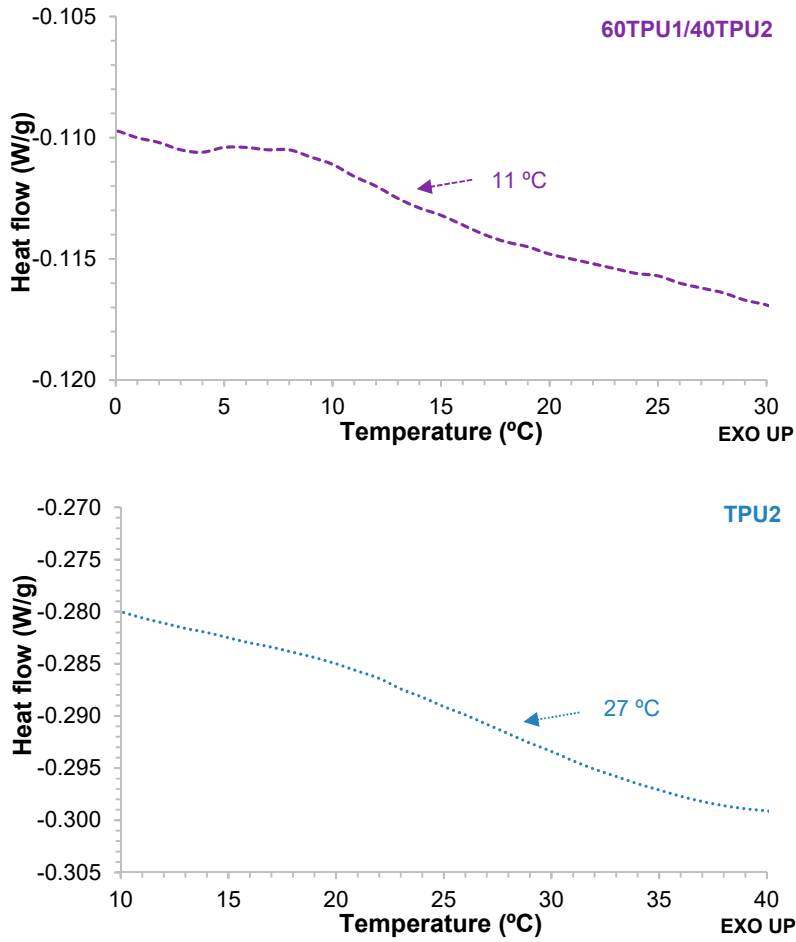

Figure S2. Expanded region of the DSC thermograms of TPU1, TPU2, and TPU1 + TPU2 blends, showing more clearly the glass transitions due to the soft segments. Second DSC heating run.

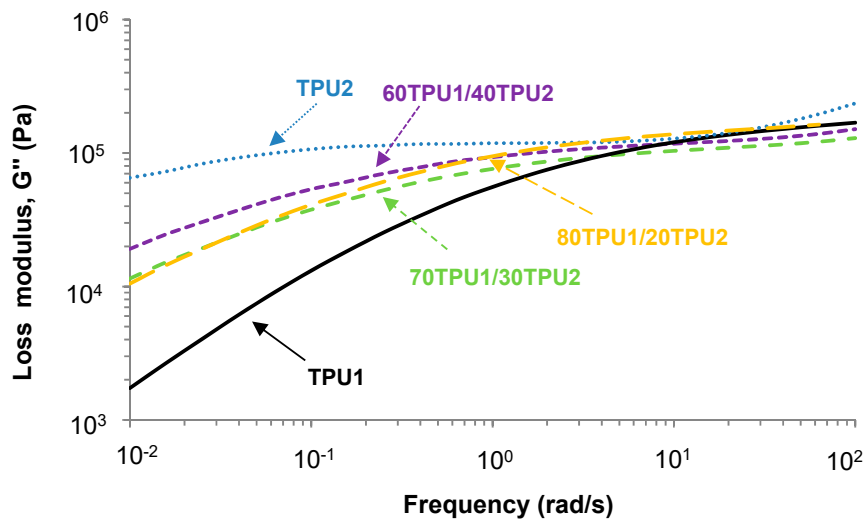

Figure S3. Variation in the loss modulus ( $G''$ ) at 25 °C as a function of the frequency of TPU1, TPU2, and TPU1 + TPU2 blends. Plate-plate rheology experiments. Frequency sweep.
